# Supplementary material
Source: PubMed Central journal article supplement (PMC7653620)
Supplement: ajtr0012-6775-f9.pdf [file ajtr0012-6775-f9.pdf]

## RBPs for prognosis signature prediction in GC

**Table S1.** Primer sequence used in this study

| Gene name | Forward primer                | Reverse primer               |
|-----------|-------------------------------|------------------------------|
| ACTB      | 5'-CACCATTGGCAATGAGCGGTTC-3'  | 5'-AGGTCTTTGCGGATGTCCACGT-3' |
| HNRNPL    | 5'-TCGATCACCACGGATGTTCTT-3'   | 5'-AAGCGTGTAGGCTTTGCGT-3'    |
| PABPN1    | 5'-GGAGCTGGAAGCTATCAAAGC-3'   | 5'-CCTGGAGGTGGACTCATATTCA-3' |
| PCF11     | 5'-GTTGGAAGAGAGTATCTCACTGC-3' | 5'-GCTAGACGTATTCACATTGGGG-3' |
| SNRPN     | 5'-GCCGAATCTTCATTGGCACCTTT-3' | 5'-TCTTCACGCTCTGGTTGCTTCG-3' |
| EEF1A2    | 5'-CCATGTGTGTGGAGAGCTTCTC-3'  | 5'-TCTCCACGTTCTTGATGACGCC-3' |
| MRPS5     | 5'-CTGTGGAAGGCGCTTAGC-3'      | 5'-TTCACCAATGATCTGACCCCT-3'  |

**Table S2.** Differentially expressed RBPs

| gene ID  | Ensembl ID      | logFC       |
|----------|-----------------|-------------|
| MIF      | ENSG00000240972 | 4.616325982 |
| TOP2A    | ENSG00000131747 | 3.780138749 |
| PCLAF    | ENSG00000166803 | 2.909026111 |
| KIF11    | ENSG00000138160 | 2.828095106 |
| ANPEP    | ENSG00000166825 | 2.592736520 |
| OAS3     | ENSG00000111331 | 2.532086750 |
| GNL3L    | ENSG00000130119 | 2.394930327 |
| OAS2     | ENSG00000111335 | 2.260364170 |
| OAS1     | ENSG00000089127 | 2.259666074 |
| KPNA2    | ENSG00000182481 | 2.191198016 |
| TTK      | ENSG00000112742 | 2.068519883 |
| PCNA     | ENSG00000132646 | 2.064532744 |
| TUBA1C   | ENSG00000167553 | 1.972380080 |
| KIF18A   | ENSG00000121621 | 1.917793746 |
| CDKN2A   | ENSG00000147889 | 1.902969785 |
| ESPL1    | ENSG00000135476 | 1.887876525 |
| CPS1     | ENSG00000021826 | 1.789897773 |
| ESRP1    | ENSG00000104413 | 1.788758090 |
| PTBP3    | ENSG00000119314 | 1.786968807 |
| APOBEC3B | ENSG00000179750 | 1.685290903 |
| PABPC3   | ENSG00000151846 | 1.668353769 |
| PABPC1   | ENSG00000070756 | 1.660865269 |
| SNRPB    | ENSG00000125835 | 1.613898815 |
| GAPDH    | ENSG00000111640 | 1.584521653 |
| MEX3D    | ENSG00000181588 | 1.561257398 |
| IFIT3    | ENSG00000119917 | 1.557153351 |
| IGF2BP2  | ENSG00000073792 | 1.535325206 |
| HELZ2    | ENSG00000130589 | 1.532080365 |
| BRCA1    | ENSG00000012048 | 1.510973055 |
| SNRPD1   | ENSG00000167088 | 1.483109456 |
| IGF2BP3  | ENSG00000136231 | 1.477366070 |
| ZC3HAV1L | ENSG00000146858 | 1.463111431 |
| MOCOS    | ENSG00000075643 | 1.452246364 |
| APOBEC1  | ENSG00000111701 | 1.415989122 |
| CASK     | ENSG00000147044 | 1.415410801 |
| RPL28    | ENSG00000108107 | 1.414092246 |
| RNASE6   | ENSG00000169413 | 1.395210872 |
| TUBB     | ENSG00000196230 | 1.373873340 |

## RBPs for prognosis signature prediction in GC

|         |                 |             |
|---------|-----------------|-------------|
| PFN1    | ENSG00000108518 | 1.358413240 |
| EIF2AK2 | ENSG00000055332 | 1.348743065 |
| AKAP17A | ENSG00000197976 | 1.348467930 |
| NUP155  | ENSG00000113569 | 1.346807169 |
| SRPK1   | ENSG00000096063 | 1.342565885 |
| PLP2    | ENSG00000102007 | 1.325721311 |
| IER5L   | ENSG00000188483 | 1.322065329 |
| EZH2    | ENSG00000106462 | 1.321904566 |
| NXT2    | ENSG00000101888 | 1.315857633 |
| ZNFX1   | ENSG00000124201 | 1.311757002 |
| RPL22L1 | ENSG00000163584 | 1.310904721 |
| CSTF2   | ENSG00000101811 | 1.289547926 |
| PRKDC   | ENSG00000253729 | 1.274612839 |
| CAPRIN1 | ENSG00000135387 | 1.241542365 |
| RPP25   | ENSG00000178718 | 1.230962338 |
| MAZ     | ENSG00000103495 | 1.229319139 |
| FAM120A | ENSG00000048828 | 1.226802301 |
| RPS21   | ENSG00000171858 | 1.213074227 |
| RBM47   | ENSG00000163694 | 1.207467660 |
| SSR1    | ENSG00000124783 | 1.195441405 |
| RPL39   | ENSG00000198918 | 1.187617993 |
| TRUB1   | ENSG00000165832 | 1.185852379 |
| IFIT2   | ENSG00000119922 | 1.178894453 |
| PATL1   | ENSG00000166889 | 1.175041875 |
| RSRC1   | ENSG00000174891 | 1.171468008 |
| SNRPB2  | ENSG00000125870 | 1.165931778 |
| MBNL3   | ENSG00000076770 | 1.160002237 |
| AIMP2   | ENSG00000106305 | 1.154779808 |
| TWISTNB | ENSG00000105849 | 1.152455517 |
| TOP1    | ENSG00000198900 | 1.144230602 |
| DDX21   | ENSG00000165732 | 1.131260099 |
| ESF1    | ENSG00000089048 | 1.122798413 |
| POLR2K  | ENSG00000147669 | 1.120274125 |
| SPATS2L | ENSG00000196141 | 1.118545281 |
| ASCC3   | ENSG00000112249 | 1.116554595 |
| WARS    | ENSG00000140105 | 1.114064564 |
| ZC3H13  | ENSG00000123200 | 1.112378830 |
| CCRN4L  | ENSG00000151014 | 1.103450358 |
| CAPG    | ENSG00000042493 | 1.101818965 |
| ZC3HAV1 | ENSG00000105939 | 1.095593967 |
| WDR43   | ENSG00000163811 | 1.094079041 |
| CFL1    | ENSG00000172757 | 1.085746608 |
| CTU1    | ENSG00000142544 | 1.085431328 |
| RPL23A  | ENSG00000198242 | 1.081272651 |
| KIF2A   | ENSG00000068796 | 1.081112037 |
| EIF6    | ENSG00000242372 | 1.080196789 |
| CAD     | ENSG00000084774 | 1.068402517 |
| SNRPF   | ENSG00000139343 | 1.067720608 |
| MRPL14  | ENSG00000180992 | 1.049919302 |

## RBPs for prognosis signature prediction in GC

|          |                 |              |
|----------|-----------------|--------------|
| IQGAP1   | ENSG00000140575 | 1.049011091  |
| ADAT1    | ENSG00000065457 | 1.042422536  |
| TMPO     | ENSG00000120802 | 1.027480113  |
| ZFP36L2  | ENSG00000152518 | 1.025828039  |
| A1CF     | ENSG00000148584 | 1.014459224  |
| KPNA3    | ENSG00000102753 | 1.006785997  |
| MRPS35   | ENSG00000061794 | 1.006056703  |
| LSM12    | ENSG00000161654 | 1.002559199  |
| MAP1S    | ENSG00000130479 | 1.001714153  |
| OASL     | ENSG00000135114 | 1.001636952  |
| DALRD3   | ENSG00000178149 | -1.001342234 |
| SFSWAP   | ENSG00000061936 | -1.010418679 |
| LRRFIP2  | ENSG00000093167 | -1.011389492 |
| ABCF3    | ENSG00000161204 | -1.011816163 |
| UNKL     | ENSG00000059145 | -1.014432598 |
| SRRM2    | ENSG00000167978 | -1.015113563 |
| PCF11    | ENSG00000165494 | -1.016758059 |
| HNRNPL   | ENSG00000104824 | -1.018949233 |
| RNASEH2C | ENSG00000172922 | -1.022081588 |
| MRPS25   | ENSG00000131368 | -1.025229201 |
| SF3B2    | ENSG00000087365 | -1.029326564 |
| GKAP1    | ENSG00000165113 | -1.037233457 |
| MCAM     | ENSG00000076706 | -1.038100851 |
| FNBP4    | ENSG00000109920 | -1.047688101 |
| RPL3     | ENSG00000100316 | -1.057609154 |
| RPS25    | ENSG00000118181 | -1.057609297 |
| HABP4    | ENSG00000130956 | -1.057770014 |
| SMAD9    | ENSG00000120693 | -1.065737823 |
| FAM98C   | ENSG00000130244 | -1.068728919 |
| SRP68    | ENSG00000167881 | -1.072442698 |
| DUS1L    | ENSG00000169718 | -1.075515232 |
| DZIP1    | ENSG00000134874 | -1.078483833 |
| PRDX2    | ENSG00000167815 | -1.082253175 |
| ZCCHC24  | ENSG00000165424 | -1.094368459 |
| KHNYN    | ENSG00000100441 | -1.098960912 |
| CPEB1    | ENSG00000214575 | -1.100570707 |
| SREK1    | ENSG00000153914 | -1.104776762 |
| DGCR8    | ENSG00000128191 | -1.107347716 |
| ZRSR1    | ENSG00000212643 | -1.111987204 |
| EXOSC7   | ENSG00000075914 | -1.114726925 |
| RNF214   | ENSG00000167257 | -1.120780664 |
| DUSP1    | ENSG00000120129 | -1.122949224 |
| RPUSD4   | ENSG00000165526 | -1.124053188 |
| RPL24    | ENSG00000114391 | -1.124448919 |
| PNN      | ENSG00000100941 | -1.128915968 |
| YBX3     | ENSG00000060138 | -1.133205695 |
| ENO3     | ENSG00000108515 | -1.133943228 |
| TRMT2A   | ENSG00000099899 | -1.134265998 |
| VAR52    | ENSG00000137411 | -1.136219092 |

## RBPs for prognosis signature prediction in GC

|          |                 |              |
|----------|-----------------|--------------|
| IFRD1    | ENSG00000006652 | -1.136303582 |
| LUC7L3   | ENSG00000108848 | -1.139296412 |
| DDX42    | ENSG00000198231 | -1.156036735 |
| KHDRBS3  | ENSG00000131773 | -1.164175577 |
| PPWD1    | ENSG00000113593 | -1.166196155 |
| RBM20    | ENSG00000203867 | -1.168551751 |
| RBPMS    | ENSG00000157110 | -1.170810166 |
| UPF3A    | ENSG00000169062 | -1.182980948 |
| RPSA     | ENSG00000168028 | -1.183567962 |
| TIMM44   | ENSG00000104980 | -1.204468629 |
| RPL26    | ENSG00000161970 | -1.208759051 |
| RPS16    | ENSG00000105193 | -1.214222057 |
| MTERF4   | ENSG00000122085 | -1.214515832 |
| FIP1L1   | ENSG00000145216 | -1.220495176 |
| NSA2     | ENSG00000164346 | -1.221942663 |
| DDX3Y-   | ENSG00000067048 | -1.229846910 |
| RSRC2    | ENSG00000111011 | -1.236127166 |
| NOL3     | ENSG00000140939 | -1.237009104 |
| MRPS6    | ENSG00000243927 | -1.237231750 |
| AKR1B1   | ENSG00000085662 | -1.237277781 |
| C11orf58 | ENSG00000110696 | -1.245626594 |
| PCBP4    | ENSG00000090097 | -1.251727031 |
| EEF1D    | ENSG00000104529 | -1.253346870 |
| RPLP1    | ENSG00000137818 | -1.256042596 |
| CAPRIN2  | ENSG00000110888 | -1.260259924 |
| ADARB1   | ENSG00000197381 | -1.263713353 |
| WDR83    | ENSG00000123154 | -1.268084039 |
| TRPT1    | ENSG00000149743 | -1.282488567 |
| THOC1    | ENSG00000079134 | -1.283713908 |
| ANG      | ENSG00000214274 | -1.292762298 |
| NKX6-2   | ENSG00000148826 | -1.294552392 |
| SPG20    | ENSG00000133104 | -1.296132917 |
| HARS     | ENSG00000170445 | -1.299155062 |
| EIF3L    | ENSG00000100129 | -1.315410291 |
| MATR3    | ENSG00000015479 | -1.321112054 |
| TOP3B    | ENSG00000100038 | -1.339719523 |
| RPS4Y1   | ENSG00000129824 | -1.346938672 |
| CSDC2    | ENSG00000172346 | -1.349408084 |
| PTPRM    | ENSG00000173482 | -1.361638474 |
| FGF2     | ENSG00000138685 | -1.369726811 |
| QTRT1    | ENSG00000213339 | -1.373321530 |
| L1CAM    | ENSG00000198910 | -1.379817265 |
| SAFB     | ENSG00000160633 | -1.384041024 |
| EIF1B    | ENSG00000114784 | -1.384679909 |
| DDX26B   | ENSG00000165359 | -1.385280599 |
| RPS13    | ENSG00000110700 | -1.387911154 |
| HPSE2    | ENSG00000172987 | -1.394976075 |
| RBM39    | ENSG00000131051 | -1.400040668 |
| PTGS1    | ENSG00000095303 | -1.400657506 |

## RBPs for prognosis signature prediction in GC

|          |                 |              |
|----------|-----------------|--------------|
| HNRNPUL2 | ENSG00000214753 | -1.416150565 |
| NXF1     | ENSG00000162231 | -1.417490958 |
| EWSR1    | ENSG00000182944 | -1.419740147 |
| PRPF39   | ENSG00000185246 | -1.425456258 |
| RPL10    | ENSG00000147403 | -1.447258173 |
| PCBP2    | ENSG00000197111 | -1.450334238 |
| RPS27A   | ENSG00000143947 | -1.455386974 |
| DDX17    | ENSG00000100201 | -1.456848495 |
| CTIF     | ENSG00000134030 | -1.485382424 |
| RAP1GAP2 | ENSG00000132359 | -1.501150227 |
| NDRG1    | ENSG00000104419 | -1.501476804 |
| WDR61    | ENSG00000140395 | -1.505101600 |
| EIF2B4   | ENSG00000115211 | -1.514657591 |
| SUGP2    | ENSG00000064607 | -1.517801795 |
| GATB     | ENSG00000059691 | -1.537233085 |
| DRG2     | ENSG00000108591 | -1.545938156 |
| SDHA     | ENSG00000073578 | -1.575015171 |
| SPARCL1  | ENSG00000152583 | -1.591361752 |
| METTL3   | ENSG00000165819 | -1.595485901 |
| HNRNPH1  | ENSG00000169045 | -1.599533276 |
| WIPF3    | ENSG00000122574 | -1.600966650 |
| MRPS5    | ENSG00000144029 | -1.619964609 |
| SRSF9    | ENSG00000111786 | -1.621080801 |
| WDR19    | ENSG00000157796 | -1.629942646 |
| EPHB6    | ENSG00000106123 | -1.634397189 |
| RPL34    | ENSG00000109475 | -1.638581769 |
| HIP1R    | ENSG00000130787 | -1.642950635 |
| EIF3G    | ENSG00000130811 | -1.643036820 |
| REXO2    | ENSG00000076043 | -1.647302960 |
| KIAA0391 | ENSG00000100890 | -1.652030440 |
| CLK4     | ENSG00000113240 | -1.700558827 |
| LARP6    | ENSG00000166173 | -1.742770428 |
| TUT1     | ENSG00000149016 | -1.750415458 |
| PDCD4    | ENSG00000150593 | -1.751064128 |
| MYEF2    | ENSG00000104177 | -1.795808329 |
| EIF4A2   | ENSG00000156976 | -1.809176877 |
| AFF3     | ENSG00000144218 | -1.817523556 |
| CLASRP   | ENSG00000104859 | -1.842135493 |
| PABPN1   | ENSG00000100836 | -1.857077442 |
| SNRPN    | ENSG00000128739 | -1.864782066 |
| PAN2     | ENSG00000135473 | -1.869587528 |
| PRPF40B  | ENSG00000110844 | -1.948260521 |
| PPAN     | ENSG00000130810 | -1.960202878 |
| AKAP8L   | ENSG00000011243 | -1.982599571 |
| RPL9     | ENSG00000163682 | -1.996051867 |
| ZGPAT    | ENSG00000197114 | -1.996446683 |
| VKORC1   | ENSG00000167397 | -2.005882106 |
| PSMD9    | ENSG00000110801 | -2.045059573 |
| SARS2    | ENSG00000104835 | -2.049979488 |
| ARHGEF28 | ENSG00000214944 | -2.054174771 |

## RBPs for prognosis signature prediction in GC

|          |                 |              |
|----------|-----------------|--------------|
| SIDT2    | ENSG00000149577 | -2.086031483 |
| LUC7L    | ENSG00000007392 | -2.094979656 |
| CLK1     | ENSG00000013441 | -2.095794644 |
| RASD1    | ENSG00000108551 | -2.119030825 |
| SNRNP70  | ENSG00000104852 | -2.129182590 |
| RBM6     | ENSG00000004534 | -2.129798401 |
| PAIP2B   | ENSG00000124374 | -2.152251356 |
| OBSL1    | ENSG00000124006 | -2.158659894 |
| LAMA2    | ENSG00000196569 | -2.170359947 |
| SRSF5    | ENSG00000100650 | -2.172722112 |
| MRPL46   | ENSG00000259494 | -2.175444195 |
| RBM5     | ENSG00000003756 | -2.175649321 |
| GLTSCR2  | ENSG00000105373 | -2.190032289 |
| U2AF1L4  | ENSG00000161265 | -2.198950647 |
| ZMAT5    | ENSG00000100319 | -2.255857690 |
| PTRH1    | ENSG00000187024 | -2.281115845 |
| HSPB8    | ENSG00000152137 | -2.319452253 |
| RBPM52   | ENSG00000166831 | -2.360506693 |
| RPS19BP1 | ENSG00000187051 | -2.366509504 |
| EEF1A2   | ENSG00000101210 | -2.374326718 |
| CIRBP    | ENSG00000099622 | -2.384140637 |
| IPO4     | ENSG00000196497 | -2.386449010 |
| NDRG2    | ENSG00000165795 | -2.389290213 |
| AZGP1    | ENSG00000160862 | -2.451177416 |
| APOBEC2  | ENSG00000124701 | -2.492289244 |
| CELF6    | ENSG00000140488 | -2.502476247 |
| CTAGE5   | ENSG00000150527 | -2.578420036 |
| MRPL38   | ENSG00000204316 | -2.595650246 |
| RBM4     | ENSG00000173933 | -2.833868810 |
| MRPS24   | ENSG00000062582 | -3.126963746 |
| AARSD1   | ENSG00000266967 | -3.369139778 |
| ANKHD1   | ENSG00000131503 | -3.478214046 |
| PSMA6    | ENSG00000100902 | -3.515921976 |
| MYH11    | ENSG00000133392 | -3.624940586 |
| RPL17    | ENSG00000265681 | -3.650876147 |
| TXNDC5   | ENSG00000239264 | -3.664767164 |
| RNASEK   | ENSG00000219200 | -3.756526270 |
| AKAP2    | ENSG00000241978 | -3.918699989 |
| RNASE4   | ENSG00000258818 | -4.379672757 |
| SARNP    | ENSG00000205323 | -4.519438989 |
| EIF4A1   | ENSG00000161960 | -5.240499775 |
| ARL6IP4  | ENSG00000182196 | -6.028148457 |
| EEF1G    | ENSG00000254772 | -7.938209368 |

## RBPs for prognosis signature prediction in GC

**Table S3.** GO and KEGG enrichment analysis of differentially expressed RBPs

| Category                                        | Enrichment term                                                     | P Value   | FDR      |
|-------------------------------------------------|---------------------------------------------------------------------|-----------|----------|
| GO enrichment analysis for up-regulation RBPs   |                                                                     |           |          |
| GOTERM_BP_DIRECT                                | response to virus                                                   | 5.92E-09  | 8.80E-06 |
| GOTERM_BP_DIRECT                                | defense response to virus                                           | 2.02E-07  | 3.00E-04 |
| GOTERM_BP_DIRECT                                | negative regulation of viral genome replication                     | 2.01E-06  | 2.98E-03 |
| GOTERM_BP_DIRECT                                | RNA splicing                                                        | 2.53E-06  | 3.76E-03 |
| GOTERM_BP_DIRECT                                | type I interferon signaling pathway                                 | 2.11E-05  | 3.13E-02 |
| GOTERM_CC_DIRECT                                | cytoplasm                                                           | 4.17E-09  | 5.07E-06 |
| GOTERM_CC_DIRECT                                | nucleus                                                             | 4.69E-09  | 5.70E-06 |
| GOTERM_CC_DIRECT                                | nucleoplasm                                                         | 3.06E-08  | 3.72E-05 |
| GOTERM_CC_DIRECT                                | cytosol                                                             | 6.98E-08  | 8.49E-05 |
| GOTERM_CC_DIRECT                                | nucleolus                                                           | 1.37E-07  | 1.67E-04 |
| GOTERM_MF_DIRECT                                | poly(A) RNA binding                                                 | 1.88E-23  | 2.37E-20 |
| GOTERM_MF_DIRECT                                | RNA binding                                                         | 4.66E-09  | 5.88E-06 |
| GOTERM_MF_DIRECT                                | 2'-5'-oligoadenylate synthetase activity                            | 6.04E-07  | 7.62E-04 |
| GOTERM_MF_DIRECT                                | double-stranded RNA binding                                         | 9.09E-07  | 1.15E-03 |
| GOTERM_MF_DIRECT                                | nucleotide binding                                                  | 1.78E-05  | 2.25E-02 |
| GO enrichment analysis for down-regulation RBPs |                                                                     |           |          |
| GOTERM_BP_DIRECT                                | translational initiation                                            | 6.11E-17  | 1.67E-13 |
| GOTERM_BP_DIRECT                                | mRNA processing                                                     | 6.56E-16  | 9.99E-13 |
| GOTERM_BP_DIRECT                                | mRNA splicing, via spliceosome                                      | 4.56E-14  | 6.82E-11 |
| GOTERM_BP_DIRECT                                | SRP-dependent cotranslational protein targeting to membrane         | 3.34E-13  | 5.01E-10 |
| GOTERM_BP_DIRECT                                | RNA processing                                                      | 5.23E-13  | 7.83E-10 |
| GOTERM_BP_DIRECT                                | nuclear-transcribed mRNA catabolic process, nonsense-mediated decay | 5.78E-13  | 8.66E-10 |
| GOTERM_BP_DIRECT                                | translation                                                         | 5.26E-12  | 7.88E-09 |
| GOTERM_BP_DIRECT                                | RNA splicing                                                        | 6.36E-12  | 9.53E-09 |
| GOTERM_BP_DIRECT                                | viral transcription                                                 | 6.21E-11  | 9.31E-08 |
| GOTERM_BP_DIRECT                                | rRNA processing                                                     | 2.65E-09  | 3.97E-06 |
| GOTERM_BP_DIRECT                                | mRNA 3'-end processing                                              | 8.52E-06  | 1.28E-02 |
| GOTERM_BP_DIRECT                                | mRNA splice site selection                                          | 1.85E-05  | 2.76E-02 |
| GOTERM_BP_DIRECT                                | mitochondrial translation                                           | 2.40E-05  | 3.59E-02 |
| GOTERM_CC_DIRECT                                | nuclear speck                                                       | 2.56E-12  | 3.17E-09 |
| GOTERM_CC_DIRECT                                | nucleoplasm                                                         | 2.08E-11  | 2.57E-08 |
| GOTERM_CC_DIRECT                                | ribosome                                                            | 2.47E-10  | 3.06E-07 |
| GOTERM_CC_DIRECT                                | nucleus                                                             | 1.23E-08  | 1.52E-05 |
| GOTERM_CC_DIRECT                                | cytoplasm                                                           | 1.86E-07  | 2.30E-04 |
| GOTERM_CC_DIRECT                                | U2-type prespliceosome                                              | 2.87E-07  | 3.56E-04 |
| GOTERM_CC_DIRECT                                | nucleolus                                                           | 5.27E-07  | 6.53E-04 |
| GOTERM_CC_DIRECT                                | U1 snRNP                                                            | 5.32E-07  | 6.59E-04 |
| GOTERM_CC_DIRECT                                | cytosolic large ribosomal subunit                                   | 2.27E-06  | 2.82E-03 |
| GOTERM_CC_DIRECT                                | cytosolic small ribosomal subunit                                   | 3.91E-06  | 4.84E-03 |
| GOTERM_MF_DIRECT                                | RNA binding                                                         | 9.73E-34  | 1.25E-30 |
| GOTERM_MF_DIRECT                                | poly(A) RNA binding                                                 | 6.65E-32  | 8.54E-29 |
| GOTERM_MF_DIRECT                                | nucleotide binding                                                  | 5.33E-18  | 6.85E-15 |
| GOTERM_MF_DIRECT                                | structural constituent of ribosome                                  | 6.10E-11  | 7.83E-08 |
| GOTERM_MF_DIRECT                                | mRNA binding                                                        | 3.95E-08  | 5.07E-05 |
| GOTERM_MF_DIRECT                                | nucleic acid binding                                                | 8.76E-08  | 1.13E-04 |
| KEGG enrichment analysis for dysregulated RBPs  |                                                                     |           |          |
| KEGG PATHWAY                                    | Ribosome                                                            | 1.20E-17  | 1.51E-15 |
| KEGG PATHWAY                                    | RNA transport                                                       | 9.46E-10  | 5.96E-08 |
| KEGG PATHWAY                                    | Spliceosome                                                         | 5.83E-08  | 2.45E-06 |
| KEGG PATHWAY                                    | mRNA surveillance pathway                                           | 1.23E-07  | 3.87E-06 |
| KEGG PATHWAY                                    | RNA degradation                                                     | 3.62E-05  | 9.11E-04 |
| KEGG PATHWAY                                    | Ribosome biogenesis in eukaryotes                                   | 1.37E-04  | 2.88E-03 |
| KEGG PATHWAY                                    | Aminoacyl-tRNA biosynthesis                                         | 1.66 E-04 | 2.99E-03 |
| KEGG PATHWAY                                    | Influenza A                                                         | 5.53 E-04 | 8.70E-03 |

# RBPs for prognosis signature prediction in GC

A

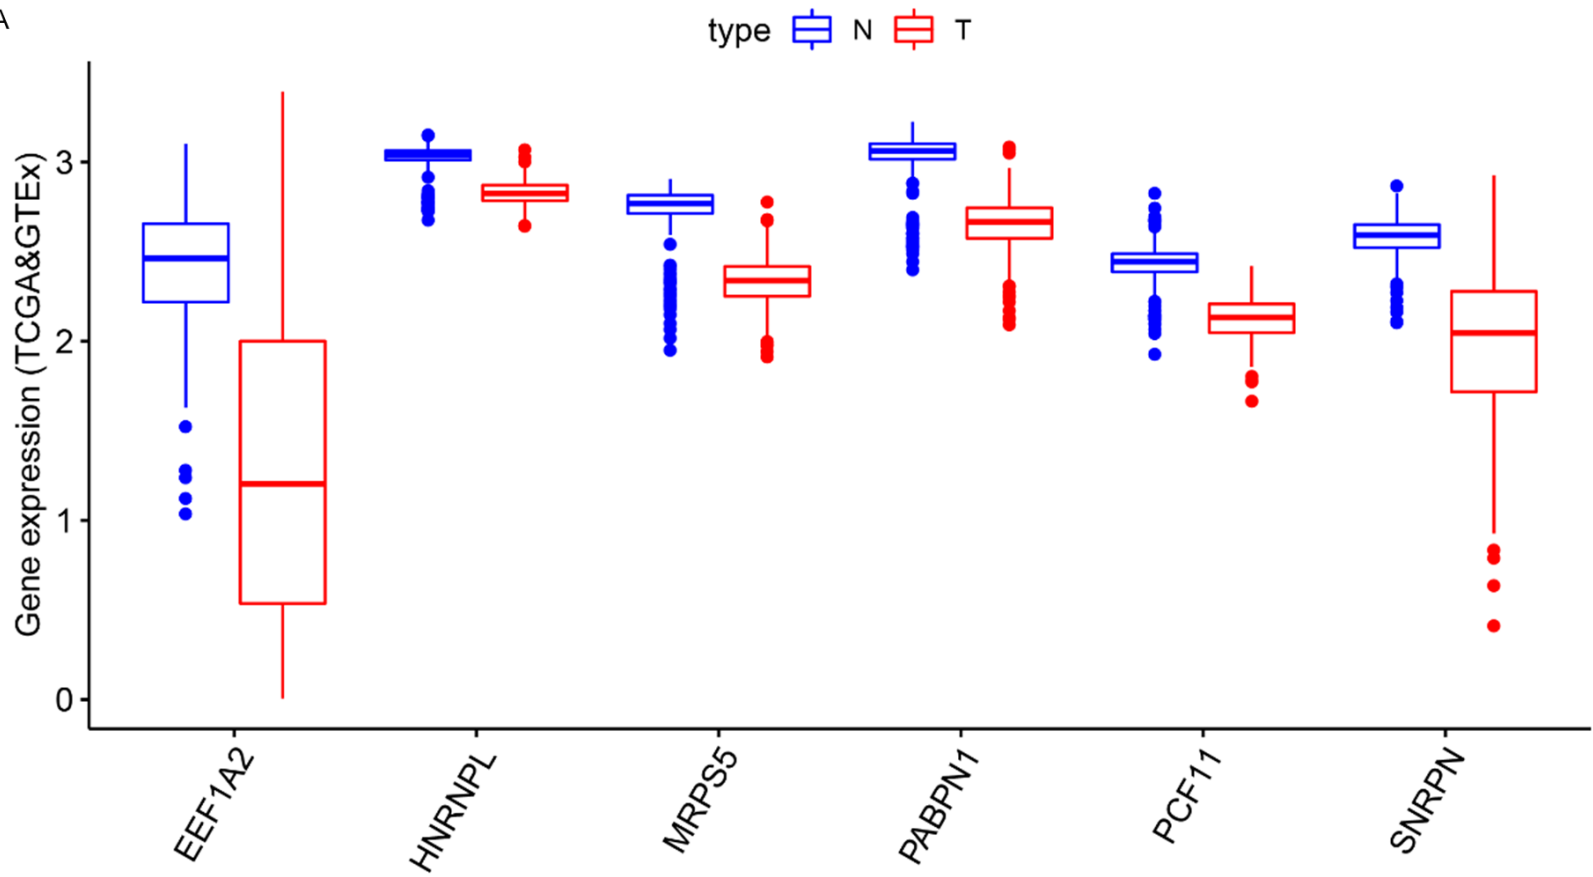

B

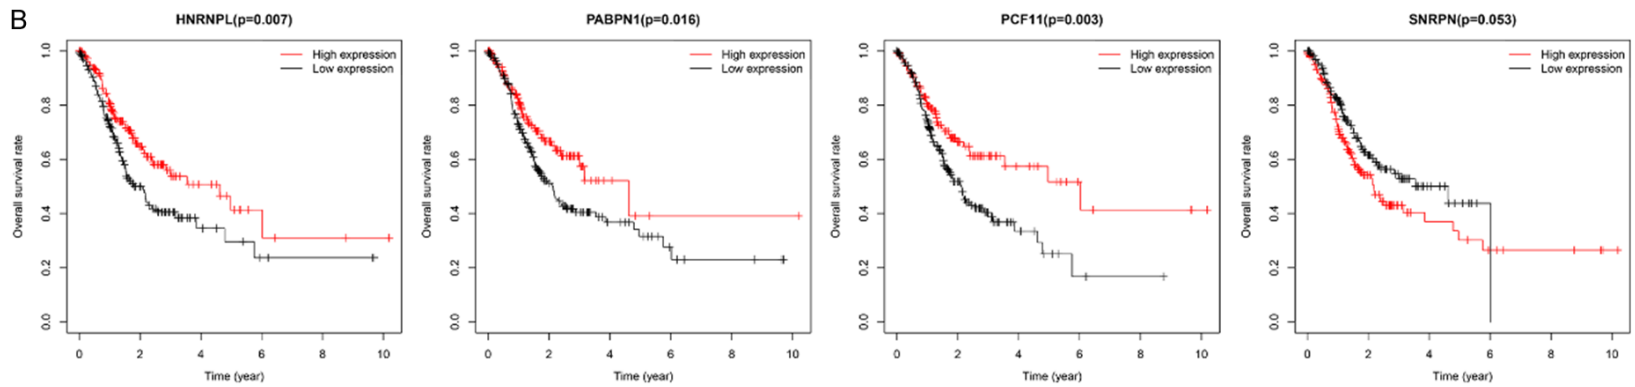



## RBPs for prognosis signature prediction in GC

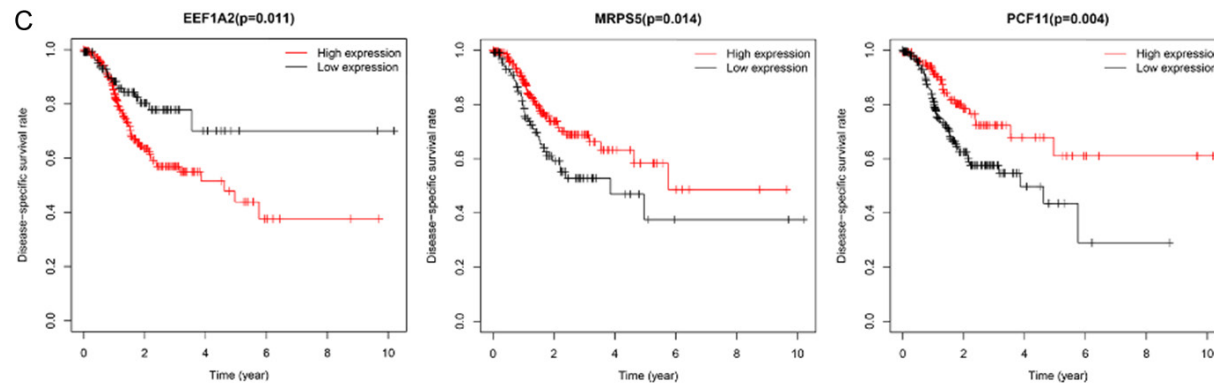

**Figure S1.** TCGA combined with GTEx database to analyze the expression and prognosis of OS and DSS-related hub RBP. A. The expression of six hub RBPs in gastric cancer tissues was lower than that in normal tissues. B. The relationship between OS-related hub RBPs and the overall survival. C. The relationship between DSS-related hub RBPs and disease-specific survival.
